# Supplementary material for: Assessment of Physical Tests in 6–11 Years Old Children: Findings from the Play Lifestyle and Activity in Youth (PLAY) Study
Source: MDPI journal article supplement (doi:10.3390/ijerph20032552), 2023-01-31
Supplement: s1 [file s1]

Supplement Table S1. Obstacle course points system

|                                                                                                                                                 | Points   | Note                  | Possible Maximum points |
|-------------------------------------------------------------------------------------------------------------------------------------------------|----------|-----------------------|-------------------------|
| <b>Single leg hop:</b>                                                                                                                          |          |                       |                         |
| Landing in inner circle*                                                                                                                        | 2 points | 6 circles             | 12 points               |
| Using the same foot in consecutive hops in each station                                                                                         | 1 point  | 2 single hop stations | 2 points                |
| Completing the consecutive hops in each station without extra hop                                                                               | 1 point  | 2 single hop stations | 2 points                |
| <b>Double leg hop:</b>                                                                                                                          |          |                       |                         |
| Demonstrating sound landing mechanics with good balance                                                                                         | 2 points | 3 hop-landings        | 6 points                |
| Completing the consecutive hop-landing on both feet at the same time                                                                            | 1 point  | 1 double hop station  | 1 point                 |
| Performing consecutive hops without contacting objects <sup>¶</sup>                                                                             | 1 point  | 1 double hop station  | 1 point                 |
| <b>Kicking a ball:</b>                                                                                                                          |          |                       |                         |
| Approaching a ball with continuous, steady running speed without stopping                                                                       | 1 point  | 1 kicking station     | 1 point                 |
| Final step: Taking a slightly longer step before previous step to prepare for kicking movement                                                  | 1 point  | 1 kicking station     | 1 point                 |
| Kicking leg: Kicking a ball with smooth back-swing, downwards kicking motion, foot contact with a ball, and follow-through after kicking a ball | 1 point  | 1 kicking station     | 1 point                 |
| Supporting leg: Planting firmly to assist entire kicking a ball motion                                                                          | 1 point  | 1 kicking station     | 1 point                 |
| A ball goes through center of two cones <sup>‡</sup>                                                                                            | 3 points | 1 kicking station     | 3 points                |
| <b>Catching a ball:</b>                                                                                                                         |          |                       |                         |
| Being able to stop at catching line with preparing to catch a ball                                                                              | 1 point  | 1 catching station    | 1 point                 |

|                                                                     |         |                    |         |
|---------------------------------------------------------------------|---------|--------------------|---------|
| A thrown ball did not pass through hand(s) and hit other body parts | 1 point | 1 catching station | 1 point |
| Catching a ball with either one hand or two hands                   | 1 point | 1 catching station | 1 point |
| Catching a ball “cleanly” without fumbling or juggling              | 1 point | 1 catching station | 1 point |

---

**Throwing a ball:**

|                                                                             |          |                    |          |
|-----------------------------------------------------------------------------|----------|--------------------|----------|
| Showing an overhand throw with contralateral arm and foot movements         | 1 point  | 1 throwing station | 1 point  |
| Demonstrating a trunk rotation and a follow-through in the throwing motion  | 1 point  | 1 throwing station | 1 point  |
| Being able to complete entire throwing motion with a well-controlled manner | 1 point  | 1 throwing station | 1 point  |
| A ball hits center of the target (screen) <sup>§</sup>                      | 2 points | 1 throwing station | 2 points |

---

**Sliding:**

|                                                                    |         |                    |          |
|--------------------------------------------------------------------|---------|--------------------|----------|
| Being able to pick up a ball from a cone cleanly                   | 1 point | 6 cones            | 6 points |
| Being able to place a ball to a cone smoothly                      | 1 point | 6 cones            | 6 points |
| Maintaining sideway sliding motions to move to a right direction   | 1 point | 1 throwing station | 1 point  |
| Maintaining sideway sliding motions to move to a left direction    | 1 point | 1 throwing station | 1 point  |
| Being able to transfer a ball from picking up hand to placing hand | 1 point | 1 throwing station | 1 point  |
| Maintain knee bent, feet apart movements during sliding            | 1 point | 1 throwing station | 1 point  |
| Performing sliding motions with low center of gravity              | 1 point | 1 throwing station | 1 point  |

---

\*When foot was landed between inner and outer circles, 1 point was awarded.

¶ The height of the object is 15.3 cm.

‡ When a ball was passed between the middle two cones and outer two cones in each side, 2 points were awarded.

§ When a ball did not hit center of the target, but somewhere between screen, 1 point was awarded.
