# Supplementary figures and images for: Assessment of Physical Tests in 6–11 Years Old Children: Findings from the Play Lifestyle and Activity in Youth (PLAY) Study
Source: MDPI journal article supplement (doi:10.3390/ijerph20032552), 2023-01-31

Supplement Figure S1. Obstacle course diagram

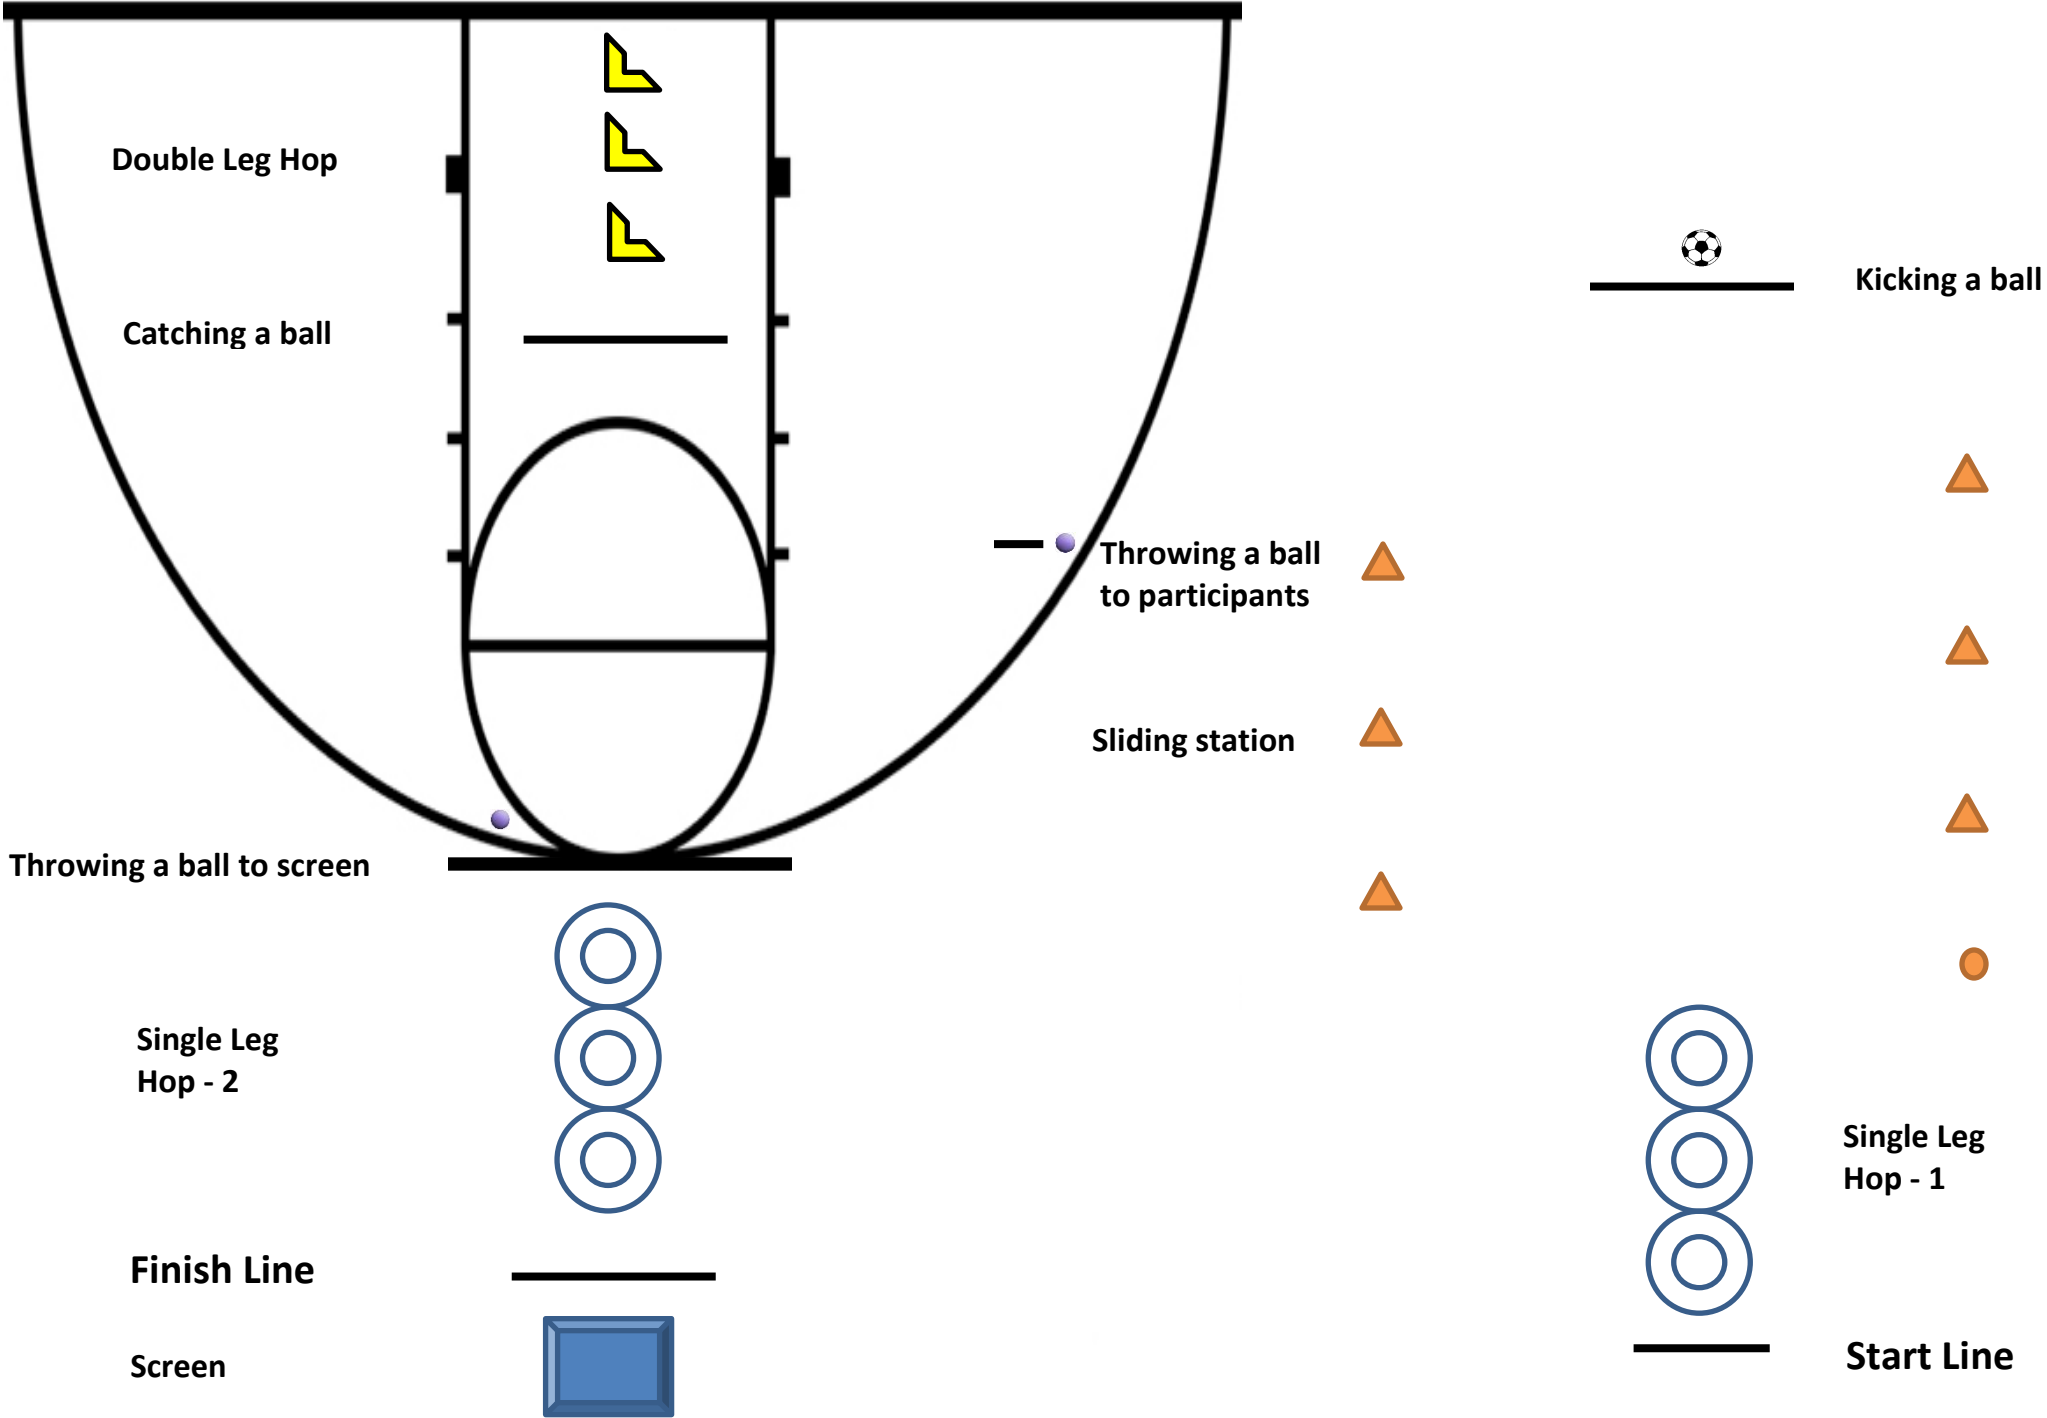

Supplement: s1 [file s1]
